# Supplementary material
Source: PubMed Central journal article supplement (PMC6210634)

## Appendices

### Appendix 1. Clinical pathway for treatment of purulent cellulitis

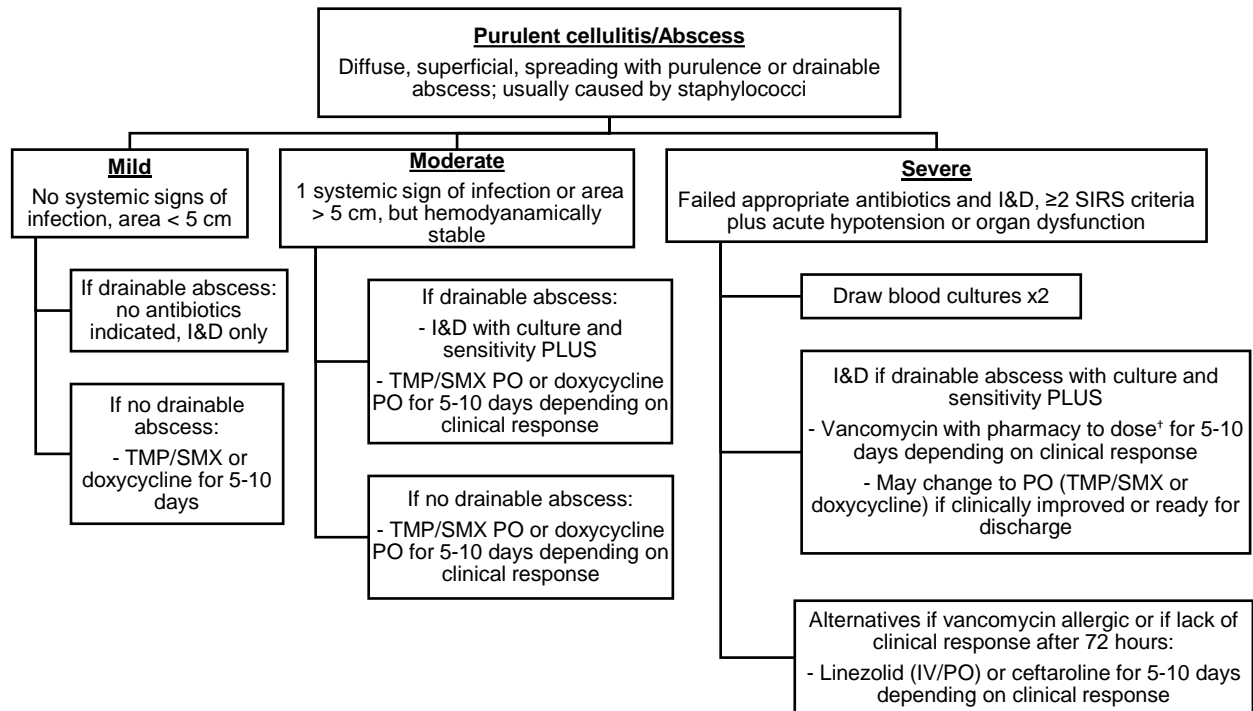

## Appendix 2. Clinical pathway for treatment of non-purulent cellulitis

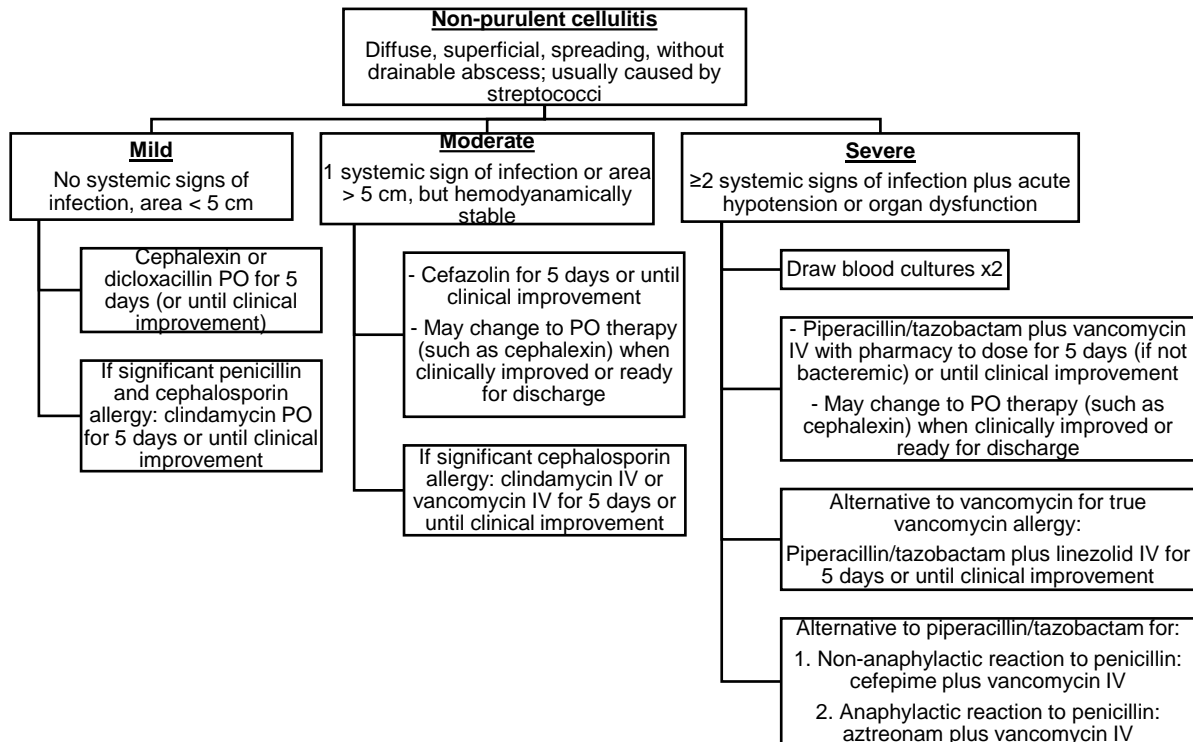

Supplement: supplemental_appendices.pdf [file supplemental_appendices.pdf]
